# Supplementary material for: Synthesis and characterization of functional eugenol derivative based layered double hydroxide and its use as a nanoflame-retardant in epoxy resin
Source: Royal Society of Chemistry journal article supplement (doi:10.1039/c4ta05740f), 2014-12-19
Supplement: c4ta05740f1.pdf [file c4ta05740f1.pdf]

## Synthesis and characterization of functional eugenol derivative based layered double hydroxide and its use as nano flame-retardant in epoxy resin

Cheng Li<sup>a,b</sup>, Jintao Wan<sup>b</sup>, Hong Fan<sup>a,\*</sup>, De-Yi Wang<sup>b,\*</sup>

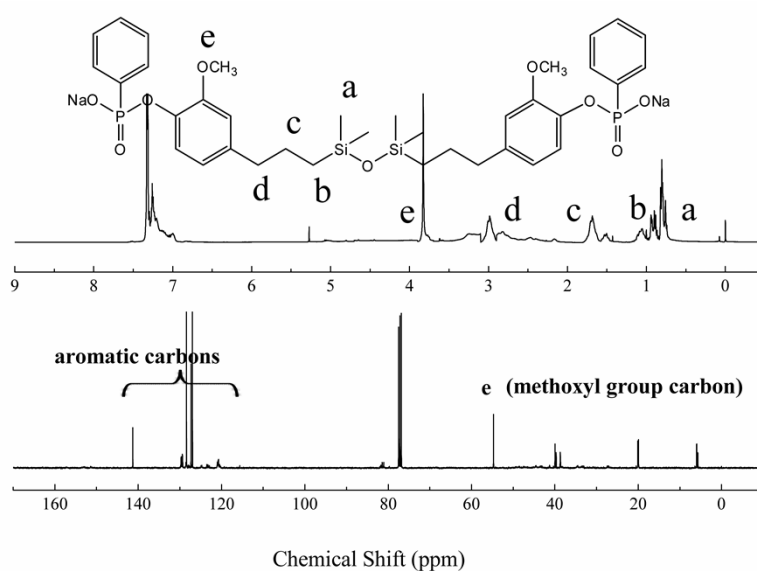

Figure S-1.  $^1\text{H}$  NMR and  $^{13}\text{C}$  NMR spectra of SIEPDP after hydrolysis

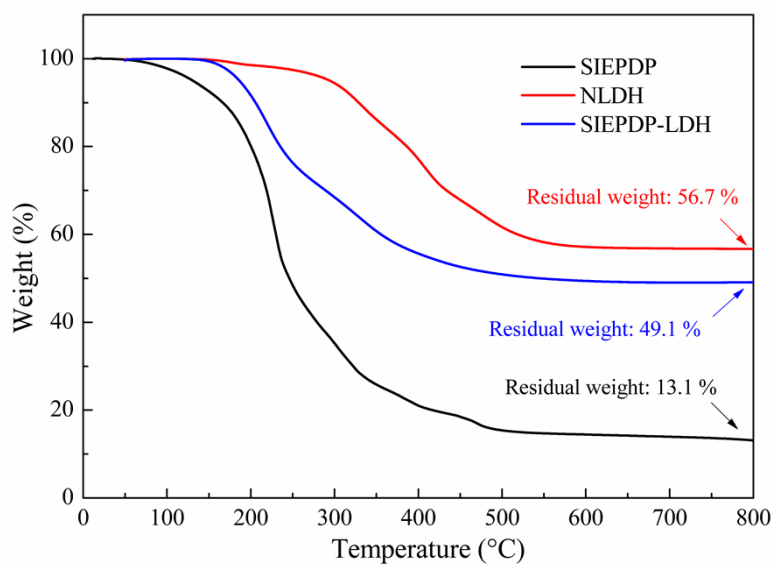

Figure S-2. TGA data of SIEPDP, NLDH and SIEPDP-LDH
